# Supplementary material for: Quantitative phenotyping via deep barcode sequencing
Source: HighWire-hosted journal article supplement (doi:10.1101/gr.093955.109), 2009-07-21
Supplement: Bar-seq_Supplemental_Figure_5.pdf [file Bar-seq_Supplemental_Figure_5.pdf]

Supplemental Figure 5:

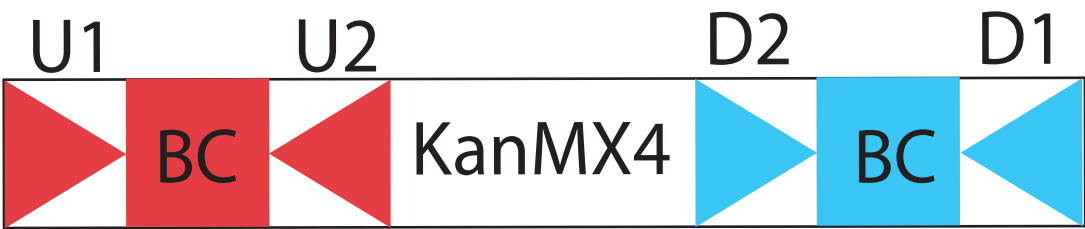

|                                              | U1    | Up Tag | U2    | KanMX4 Cassette | D2    | Down Tag | D1    |
|----------------------------------------------|-------|--------|-------|-----------------|-------|----------|-------|
| # found correct by this study                | 4242  | 4369   | 4045  |                 | 4207  | 4320     | 3867  |
| % found correct by this study                | 80.1% | 82.5%  | 82.9% |                 | 80.9% | 83.1%    | 83.7% |
| # found correct by Eason <i>et al</i> , 2004 | 4185  | 3764   | 4057  |                 | 4343  | 3807     | 4095  |
| % found correct by Eason <i>et al</i> , 2004 | 79.1% | 71.1%  | 83.2% |                 | 83.5% | 73.2%    | 88.7% |
| % Agreed                                     | 86%   | 84.4%  | 89.2% |                 | 92.6% | 85.1%    | 92%   |
